# Supplementary material for: Tracheal branching in ants is area-decreasing, violating a central assumption of network transport models
Source: PLOS journal article supplement (doi:10.1371/journal.pcbi.1007853), 2020-04-30

## Supporting Information S5

### Tracheal branching in ants is area-decreasing, violating a central assumption of network transport models

Ian J. Aitkenhead<sup>1</sup>, Grant A. Duffy<sup>1</sup>, Citsabehsan Devendran<sup>2</sup>, Michael R. Kearney<sup>3</sup>,  
Adrian Neild<sup>2</sup> and Steven L. Chown<sup>1,\*</sup>

**1** School of Biological Sciences, Monash University, Victoria 3800, Australia, **2** Department of Mechanical and Aerospace Engineering, Monash University, Victoria 3800, Australia, **3** School of BioSciences, The University of Melbourne, Victoria 3010, Australia

\* [steven.chown@monash.edu](mailto:steven.chown@monash.edu)

**S5. Effect of altered  $ppCO_2$  gradient on modelled whole-organism  $CO_2$  flux.** Results for area-conserving (yellow line), area-increasing (orange line), or area-reducing (black lines) transport networks shown. Each of the three black lines represents a model system with either no air sac (continuous solid line) or an air sac at either the 3<sup>rd</sup> or 4<sup>th</sup> level (indicated by the dashed line-segment). Tracheal branch lengths of the modelled system ranged from 211  $\mu m$  at the deepest level (level 5) to 1569  $\mu m$  at level 1 (levels 4, 3, 2 had branch lengths of 352, 586, and 976  $\mu m$ , respectively). The tracheal radius of level 5 was set at 3  $\mu m$ . Whole organism flux was modelled with a partial pressure difference of 4, 6, or 10 kPa and assuming 6 pairs of abdominal spiracles. Horizontal grey lines indicate the flux needed to meet the metabolic requirements of an average ant at rest or walking (Supporting Information S9).

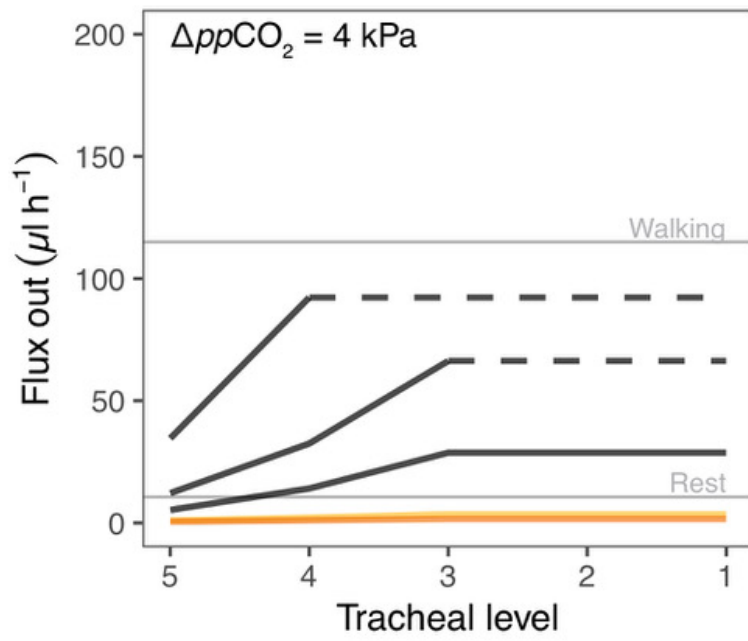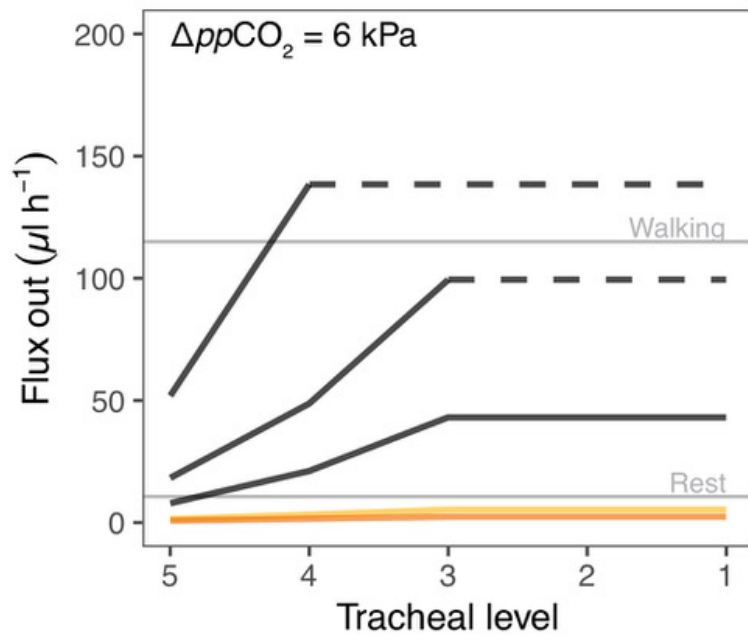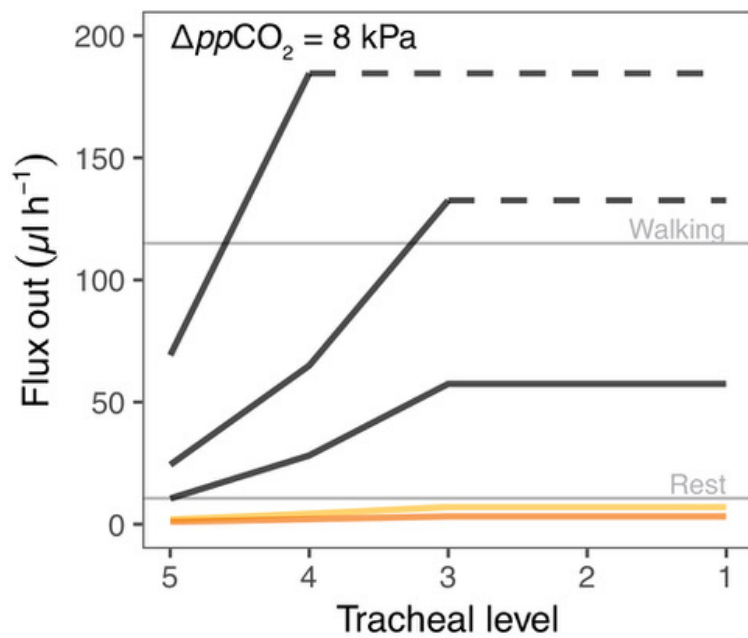

Supplement: S8 (10.1371/journal.pcbi.1007853.s008) [file journal.pcbi.1007853.s008]
